# Supplementary material for: Probing the Role of the Conserved Arg174 in Formate Dehydrogenase by Chemical Modification and Site-Directed Mutagenesis
Source: MDPI journal article supplement (doi:10.3390/molecules26051222), 2021-02-25
Supplement: s1 [file s1]

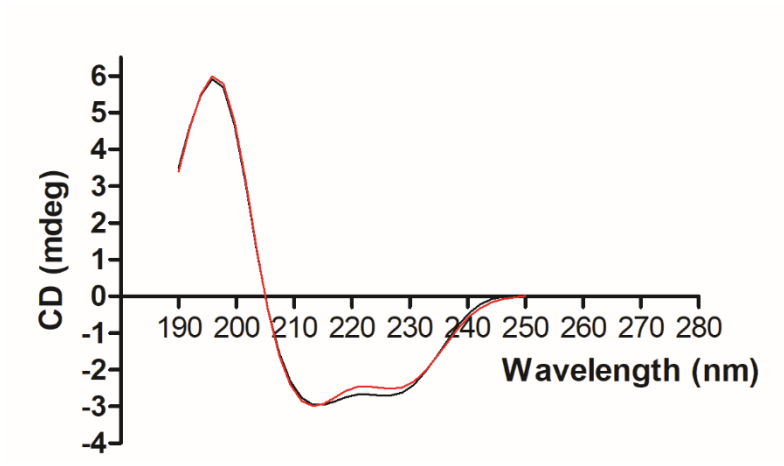

**Supplementary Fig. 1.**

CD measurements were conducted (Jasco J-1500) between 190 nm and 250 nm at 25 °C. The wild-type (red line) and mutant enzyme (black line) were diluted to 0.25 mg/mL using the sodium phosphate buffer (pH 7.4).
